# Supplementary material
Source: PubMed Central journal article supplement (PMC1750914)
Supplement: pnas_0603873103_3.pdf [file pnas_0603873103_3.pdf]

**a**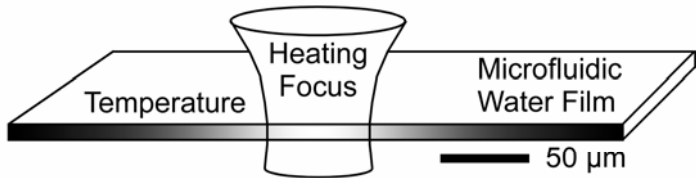

Temperature

 $\Delta T = 0.8 \text{ K}$ 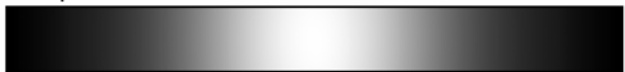**b**

Convection

 $v = 5 \text{ nm/s}$ 

A horizontal bar showing a convection profile. The bar is wider at the center and tapers towards the ends. A horizontal scale bar below the bar indicates a length of 50  $\mu\text{m}$ .
