# Supplementary material
Source: PubMed Central journal article supplement (PMC1750914)

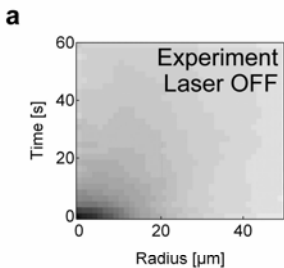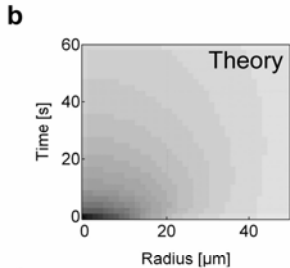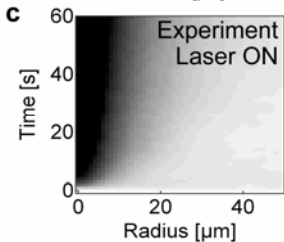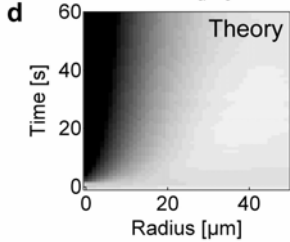

Supplement: pnas_0603873103_1.pdf [file pnas_0603873103_1.pdf]

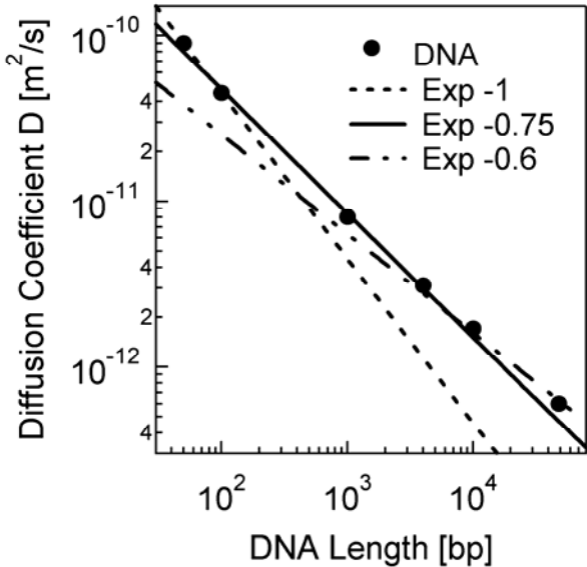

Supplement: pnas_0603873103_2.pdf [file pnas_0603873103_2.pdf]
